# Supplementary material for: The positive effect of coexisting ecosystem engineers: a unique seaweed-mussel association provides refuge for native mud crabs against a non-indigenous predator
Source: PeerJ. 2020 Dec 21;8:e10540. doi: 10.7717/peerj.10540 (PMC7759126; doi:10.7717/peerj.10540)
Supplement: Supplemental Information 1 [file peerj-08-10540-s001.xlsx]

## Sheet: Sheet1
	Supplementary file: Raw data of small crab (prey) survival rates in four distinct habitat mimics (see Methods for details).
SETTING:	LABORATORY					LABORATORY					FIELD					FIELD
PREY:	MUD CRAB SURVIVAL					GREEN CRAB SURVIVAL					MUD CRAB SURVIVAL					GREEN CRAB SURVIVAL
HABITAT:	BARE	SHELLS	IM	IM+SHELLS		BARE	SHELLS	IM	IM+SHELLS		BARE	SHELLS	IM X 3	IM+SHELLS		BARE	SHELLS	IM	IM+SHELLS
	0	1	1	1		3	5	5	5		0	2	0	4		5	4	4.5	5
	2	1	0	5		0	3	5	5		2	1	3	5		5	4.5	4	5
	0	0	3	5		2	4	4	5		0	0	0	5		5	4.5	4.5	5
	0	3	0	5		1	1	5	5		0	0	2	2		4.5	4.5	5	5
	0	1	2	5		0	4	5	5		0	0	3	1		5	4	5	5
	3	3	3	5		1	4	5	5		0	1	2	1		4.5	3	4	5
	0	1	3	3		2	1	4	5		0	0	0	2		5	3	4.5	5
	0	1	0	3		0	4	2	4		0	0	2	5		5	5	4.5	5
	0	3	0	4		4	5	5	4		4	1	3	4		5		4.5	4.5
	0	2	0	5		4	3	4	4		0		3	3		4.5		5	5
	0	1	0	5		0	4	5	5		1		4	3		4.5		5	5
	0	3	4	5		5	3	4	5		2		5	5		3		5	4
	0					5	5				1		0			4
	3					2					2		0			5
	0					2					0		1
											0		3
